# Supplementary material for: Folic acid supplements and colorectal cancer risk: meta-analysis of randomized controlled trials
Source: PubMed Central journal article supplement (PMC4487230; doi:10.1038/srep12044), 2015-07-01
Supplement: srep12044-s1.pdf [file srep12044-s1.pdf]

# **Folic acid supplements and colorectal cancer risk: meta-analysis of randomized controlled trials**

Tingting Qin<sup>1</sup>✉, Mulong Du<sup>2,3</sup>✉, Haina Du<sup>1</sup>, Yongqian Shu<sup>1</sup>, Meilin Wang<sup>2,3\*</sup>, Lingjun Zhu<sup>1\*</sup>

<sup>1</sup>Department of Oncology, The First Affiliated Hospital of Nanjing Medical University, Nanjing, China.

<sup>2</sup>Department of Environmental Genomics, Jiangsu Key Laboratory of Cancer Biomarkers, Prevention and Treatment, Cancer Center, Nanjing Medical University, Nanjing, China.

<sup>3</sup>Department of Genetic Toxicology, the Key Laboratory of Modern Toxicology of Ministry of Education, School of Public Health, Nanjing Medical University, Nanjing, China.

✉ These two authors contributed equally to this work.

\* Corresponding author:

Lingjun Zhu: Department of Oncology, The First Affiliated Hospital of Nanjing Medical University, 300 Guangzhou Rd, Nanjing 210029, Nanjing, China; Cell phone: (0)13951807457; E-mail address: zhulingjun@njmu.edu.cn; or

Meilin Wang: Department of Environmental Genomics, School of Public Health, Nanjing Medical University, 818 East Tianyuan Road, Jiangning District, Nanjing 211166, China. Tel: +86-25-86868423; Fax: +86-25-86862684. E-mail address:

[mwang@njmu.edu.cn](mailto:mwang@njmu.edu.cn)

**Supplementary Table S1.** Assessments for the eligible studies.

| Features used to assess quality of trial reports                                                                                                      | Enrolled studies (Author / Publication year) |                              |                               |                               |                            |                                  |                                |                             |
|-------------------------------------------------------------------------------------------------------------------------------------------------------|----------------------------------------------|------------------------------|-------------------------------|-------------------------------|----------------------------|----------------------------------|--------------------------------|-----------------------------|
|                                                                                                                                                       | Lonn <i>et al.</i><br>/ 2006                 | Cole <i>et al.</i><br>/ 2007 | Logan <i>et al.</i><br>/ 2008 | Zhang <i>et al.</i><br>/ 2008 | Wu <i>et al.</i><br>/ 2009 | Armitage <i>et al.</i><br>/ 2010 | Hankey <i>et al.</i><br>/ 2012 | Gao <i>et al.</i><br>/ 2013 |
| 1. Was the study described as randomized?                                                                                                             | Y                                            | Y                            | Y                             | Y                             | Y                          | Y                                | Y                              | Y                           |
| 2. Was the study described as double-blind?                                                                                                           | Y                                            | Y                            | Y                             | Y                             | Y                          | Y                                | Y                              | N                           |
| 3. Did the trial report the following methods for generating the allocation sequence: computer, random numbers table, shuffled cards or tossed coins? | Y                                            | Y                            | Y                             | U                             | Y                          | Y                                | Y                              | Y                           |
| 4. Did the trial report the numbers and reasons for withdrawal?                                                                                       | Y                                            | Y                            | Y                             | Y                             | Y                          | Y                                | Y                              | Y                           |
| 5. Did the trial report allocation concealment?                                                                                                       | Y                                            | Y                            | Y                             | U                             | Y                          | Y                                | Y                              | Y                           |

Y for "Yes", N for "No", U for "Unclear"
